# Supplementary material
Source: ML conference proceedings conference paper supplement (https://proceedings.mlr.press/v97/meyer19a.html)
Supplement: Supplementary file [file meyer19a-supp.pdf]

## A. Non-Separable Proof of Two Kernels (Theorem 6)

In this section, we prove a theorem that mirrors that of Theorem 2, but with the  $\ell_2$  slack SVM. First, we state the KKT conditions for the slack SVM. Let  $\mathbf{r}$  be the dual variables associated with the primal  $\xi \geq 0$  constraints. Then, we have 8 conditions:

1.  $1 - \xi_i - y_i \mathbf{w}^\top \phi(\mathbf{x}_i) \leq 0 \quad \forall i \in [n]$  (Primal Feasibility 1)
2.  $\xi_i \geq 0 \quad \forall i \in [n]$  (Primal Feasibility 2)
3.  $\mathbf{w} = \sum_{i=1}^n \alpha_i y_i \phi(\mathbf{x}_i)$  (Stationarity 1)
4.  $\mathbf{r} = C\xi - \alpha$  (Stationarity 2)
5.  $\alpha_i \geq 0 \quad \forall i \in [n]$  (Dual Feasibility 1)
6.  $r_i \geq 0 \quad \forall i \in [n]$  (Dual Feasibility 2)
7.  $\alpha_i(1 - \xi_i - y_i \mathbf{w}^\top \phi(\mathbf{x}_i)) = 0 \quad \forall i \in [n]$  (Complementary Slackness 1)
8.  $r_i \xi_i = 0 \quad \forall i \in [n]$  (Complementary Slackness 2)

We also provide two preliminary lemmas before proving the main theorem.

**Lemma 2.** *Let  $\alpha, \xi$  be the optimal solution to the  $\ell_2$  Slack Dual SVM problem with parameter  $C$ . Then,  $\xi = \frac{1}{C}\alpha$ . This also implies  $\alpha^\top \xi = C\|\xi\|_2^2$ .*

*Proof.* First we substitute Stationarity 2 into Complementary Slackness 2:

$$\begin{aligned} r_i \xi_i &= 0 \\ (C\xi_i - \alpha_i)\xi_i &= 0 \\ C\xi_i^2 &= \alpha_i \xi_i \end{aligned}$$

That is, when  $\xi_i \neq 0$ , we know that  $\xi_i = \frac{\alpha_i}{C}$ . This allows us to conclude that  $\xi_i \leq \frac{\alpha_i}{C}$ , since both  $\alpha_i$  and  $C$  are nonnegative. The dual problem has constraint  $\alpha_i \leq C\xi_i$ , which is equivalent to  $\xi_i \geq \frac{\alpha_i}{C}$ . Hence  $\xi_i$  is both upper and lower bounded by  $\frac{\alpha_i}{C}$ . Therefore,  $\xi_i = \frac{\alpha_i}{C}$ .  $\square$

**Lemma 3.** *Let  $\alpha, \xi$  be the optimal solution to the  $\ell_2$  Slack Dual SVM problem on input  $\tilde{\mathbf{K}}$  with parameter  $C$ . Then  $\|\alpha\|_1 = \alpha^\top \tilde{\mathbf{K}} \alpha + C\|\xi\|_2^2$ .*

*Proof.* First substitute Stationarity 1 into Complementary Slackness 1:

$$\begin{aligned} 0 &= \alpha_i(1 - \xi_i - y_i \mathbf{w}^\top \phi(\mathbf{x}_i)) \\ 0 &= \alpha_i \left( 1 - \xi_i - y_i \left( \sum_{j=1}^n \alpha_j y_j \phi(\mathbf{x}_j) \right)^\top \phi(\mathbf{x}_i) \right) \\ 0 &= \alpha_i \left( 1 - \xi_i - \sum_{j=1}^n \alpha_j y_i y_j \phi(\mathbf{x}_j)^\top \phi(\mathbf{x}_i) \right) \\ 0 &= \alpha_i \left( 1 - \xi_i - \sum_{j=1}^n \alpha_j [\tilde{\mathbf{K}}]_{i,j} \right) \\ 0 &= \alpha_i - \alpha_i \xi_i - \sum_{j=1}^n \alpha_i \alpha_j [\tilde{\mathbf{K}}]_{i,j} \\ \alpha_i &= \alpha_i \xi_i + \sum_{j=1}^n \alpha_i \alpha_j [\tilde{\mathbf{K}}]_{i,j} \end{aligned}$$

Then, we sum up over all  $i \in [n]$ :

$$\begin{aligned}\sum_{i=1}^n \alpha_i &= \sum_{i=1}^n \alpha_i \xi_i + \sum_{i=1}^n \sum_{j=1}^n \alpha_i \alpha_j [\tilde{\mathbf{K}}]_{i,j} \\ \|\alpha\|_1 &= \alpha^\top \xi + \alpha^\top \tilde{\mathbf{K}} \alpha \\ \|\alpha\|_1 &= C \|\xi\|_2^2 + \alpha^\top \tilde{\mathbf{K}} \alpha\end{aligned}$$

□

Now we prove the main theorem:

**Theorem 6 Restated.** Let  $\mathcal{S} = \{(\mathbf{x}_1, y_1), \dots, (\mathbf{x}_n, y_n)\}$  be a dataset. Let  $k_1, k_2$  be kernel functions. Define  $k_{1+2}(\cdot, \cdot) := k_1(\cdot, \cdot) + k_2(\cdot, \cdot)$ . Let  $\tilde{\mathbf{K}}_1, \tilde{\mathbf{K}}_2, \tilde{\mathbf{K}}_{1+2}$  be their labeled kernel matrices and  $\alpha_1, \alpha_2, \alpha_{1+2}$  be the corresponding Dual SVM solutions with parameter  $C = \frac{1}{2}$ . Then we have

$$\alpha_{1+2}^\top \tilde{\mathbf{K}}_{1+2} \alpha_{1+2} \leq \frac{1}{3} (\alpha_1^\top \tilde{\mathbf{K}}_1 \alpha_1 + \alpha_2^\top \tilde{\mathbf{K}}_2 \alpha_2)$$

Furthermore,

$$\alpha_{1+2}^\top \tilde{\mathbf{K}}_{1+2} \alpha_{1+2} \leq \frac{2}{3} \max\{\alpha_1^\top \tilde{\mathbf{K}}_1 \alpha_1, \alpha_2^\top \tilde{\mathbf{K}}_2 \alpha_2\}$$

*Proof.* We start with the dual objective for  $k_{1+2}$ :

$$\begin{aligned}\|\alpha_{1+2}\|_1 - \frac{1}{2} \alpha_{1+2}^\top \tilde{\mathbf{K}}_{1+2} \alpha_{1+2} - \frac{1}{2} \|\xi_{1+2}\|_2^2 &= \|\alpha_{1+2}\|_1 - \frac{1}{2} \alpha_{1+2}^\top (\tilde{\mathbf{K}}_1 + \tilde{\mathbf{K}}_2) \alpha_{1+2} - \frac{1}{2} \|\xi_{1+2}\|_2^2 \\ &= \left( \|\alpha_{1+2}\|_1 - \frac{1}{2} \alpha_{1+2}^\top \tilde{\mathbf{K}}_1 \alpha_{1+2} - \frac{1}{2} \|\xi_{1+2}\|_2^2 \right) \\ &\quad + \left( \|\alpha_{1+2}\|_1 - \frac{1}{2} \alpha_{1+2}^\top \tilde{\mathbf{K}}_2 \alpha_{1+2} - \frac{1}{2} \|\xi_{1+2}\|_2^2 \right) \\ &\quad + \left( \frac{1}{2} \|\xi_{1+2}\|_2^2 - \|\alpha_{1+2}\|_1 \right) \\ &\leq \left( \|\alpha_1\|_1 - \frac{1}{2} \alpha_1^\top \tilde{\mathbf{K}}_1 \alpha_1 - \frac{1}{2} \|\xi_1\|_2^2 \right) \\ &\quad + \left( \|\alpha_2\|_1 - \frac{1}{2} \alpha_2^\top \tilde{\mathbf{K}}_2 \alpha_2 - \frac{1}{2} \|\xi_2\|_2^2 \right) \\ &\quad + \left( \frac{1}{2} \|\xi_{1+2}\|_2^2 - \|\alpha_{1+2}\|_1 \right) \\ 2\|\alpha_{1+2}\|_1 - \frac{1}{2} \alpha_{1+2}^\top \tilde{\mathbf{K}}_{1+2} \alpha_{1+2} - \|\xi_{1+2}\|_2^2 &\leq \left( \|\alpha_1\|_1 - \frac{1}{2} \alpha_1^\top \tilde{\mathbf{K}}_1 \alpha_1 - \frac{1}{2} \|\xi_1\|_2^2 \right) + \left( \|\alpha_2\|_1 - \frac{1}{2} \alpha_2^\top \tilde{\mathbf{K}}_2 \alpha_2 - \frac{1}{2} \|\xi_2\|_2^2 \right)\end{aligned}$$

By applying Lemma 3 and some algebra, we have three useful equations:

- $2\|\alpha_{1+2}\|_1 - \frac{1}{2} \alpha_{1+2}^\top \tilde{\mathbf{K}}_{1+2} \alpha_{1+2} - \|\xi_{1+2}\|_2^2 = \frac{3}{2} \alpha_{1+2}^\top \tilde{\mathbf{K}}_{1+2} \alpha_{1+2} + (2C - 1) \|\xi_{1+2}\|_2^2$
- $\|\alpha_1\|_1 - \frac{1}{2} \alpha_1^\top \tilde{\mathbf{K}}_1 \alpha_1 - \frac{1}{2} \|\xi_1\|_2^2 = \frac{1}{2} \alpha_1^\top \tilde{\mathbf{K}}_1 \alpha_1 + \frac{2C-1}{2} \|\xi_1\|_2^2$
- $\|\alpha_2\|_1 - \frac{1}{2} \alpha_2^\top \tilde{\mathbf{K}}_2 \alpha_2 - \frac{1}{2} \|\xi_2\|_2^2 = \frac{1}{2} \alpha_2^\top \tilde{\mathbf{K}}_2 \alpha_2 + \frac{2C-1}{2} \|\xi_2\|_2^2$

Applying these equations, we continue our inequality from before,

$$\begin{aligned}
 \frac{3}{2}\alpha_{1+2}^\top \tilde{\mathbf{K}}_{1+2} \alpha_{1+2} + (2C-1)\|\xi_{1+2}\|_2^2 &\leq \left(\frac{1}{2}\alpha_1^\top \tilde{\mathbf{K}}_1 \alpha_1 + \frac{2C-1}{2}\|\xi_1\|_2^2\right) + \left(\frac{1}{2}\alpha_2^\top \tilde{\mathbf{K}}_2 \alpha_2 + \frac{2C-1}{2}\|\xi_2\|_2^2\right) \\
 \frac{3}{2}\alpha_{1+2}^\top \tilde{\mathbf{K}}_{1+2} \alpha_{1+2} &\leq \frac{1}{2}\left(\alpha_1^\top \tilde{\mathbf{K}}_1 \alpha_1 + \alpha_2^\top \tilde{\mathbf{K}}_2 \alpha_2\right) + \frac{2C-1}{2}\left(\|\xi_1\|_2^2 + \|\xi_2\|_2^2 - 2\|\xi_{1+2}\|_2^2\right) \\
 \frac{3}{2}\alpha_{1+2}^\top \tilde{\mathbf{K}}_{1+2} \alpha_{1+2} &= \frac{1}{2}\left(\alpha_1^\top \tilde{\mathbf{K}}_1 \alpha_1 + \alpha_2^\top \tilde{\mathbf{K}}_2 \alpha_2\right) + 0 \\
 \alpha_{1+2}^\top \tilde{\mathbf{K}}_{1+2} \alpha_{1+2} &= \frac{1}{3}\left(\alpha_1^\top \tilde{\mathbf{K}}_1 \alpha_1 + \alpha_2^\top \tilde{\mathbf{K}}_2 \alpha_2\right)
 \end{aligned}$$

In the second to last line, we recall that  $C = \frac{1}{2}$ , which implies  $2C - 1 = 0$ .  $\square$

## B. Proof of Many Kernels (Theorem 3)

**Theorem 3 Restated.** Let  $\mathcal{S} = \{(\mathbf{x}_1, y_1), \dots, (\mathbf{x}_n, y_n)\}$  be a dataset. Let  $k_1, k_2, \dots, k_m$  be kernel functions. Define  $k_\Sigma(\cdot, \cdot) := \sum_{t=1}^m k_t(\cdot, \cdot)$ . Let  $\tilde{\mathbf{K}}_1, \dots, \tilde{\mathbf{K}}_m, \tilde{\mathbf{K}}_\Sigma$  be their labeled kernel matrices and  $\alpha_1, \dots, \alpha_m, \alpha_\Sigma$  be the corresponding Dual SVM solutions. Then we have

$$\alpha_\Sigma^\top \tilde{\mathbf{K}}_\Sigma \alpha_\Sigma \leq 3m^{-\log_2(3)} \sum_{t=1}^m \alpha_t^\top \tilde{\mathbf{K}}_t \alpha_t$$

Furthermore

$$\alpha_\Sigma^\top \tilde{\mathbf{K}}_\Sigma \alpha_\Sigma \leq 3m^{-\log_2(3/2)} \max_{t \in [m]} \alpha_t^\top \tilde{\mathbf{K}}_t \alpha_t$$

*Proof.* Let  $\ell := \lceil \log_2(m) \rceil$  be the length of labels we give our base kernels. Now, rename each kernel  $k_t$  with the length  $\ell$  bitstring representation of the number  $t$ . For instance, if  $\ell = 4$  then we rename  $k_6$  to  $k_{0110}$ . For every length  $\ell - 1$  bitstring  $b_0 b_1 \dots b_{\ell-1}$ , define a new kernel

$$k_{b_0 b_1 \dots b_{\ell-1}}(\cdot, \cdot) := k_{b_0 b_1 \dots b_{\ell-1} 0}(\cdot, \cdot) + k_{b_0 b_1 \dots b_{\ell-1} 1}(\cdot, \cdot)$$

Repeat this process of labeling with length  $\ell - 2$  bitstrings and so on until we have defined  $k_0$  and  $k_1$ . Lastly, we define

$$k_\Sigma(\cdot, \cdot) = k_0(\cdot, \cdot) + k_1(\cdot, \cdot) = \sum_{t=1}^m k_t(\cdot, \cdot)$$

Now, recall [Theorem 2](#) (or [Theorem 6](#) if we are using the SVM with slack). Let  $[b_\ell] := \{b_0 \dots b_\ell \mid b \in \{0, 1\}\}$  denote the set of all length  $\ell$  bitstrings. Also, for every kernel  $k_{b_0 \dots b_j}$ , compute the associated kernel matrix  $\tilde{\mathbf{K}}_{b_0 \dots b_j}$  and dual solution vector  $\alpha_{b_0 \dots b_j}$ .

**Claim 1.** Fix  $j \in [\ell - 1]$ . Then

$$\alpha_\Sigma^\top \tilde{\mathbf{K}}_\Sigma \alpha_\Sigma \leq \left(\frac{1}{3}\right)^j \sum_{b_0 \dots b_j \in [b_j]} \alpha_{b_0 \dots b_j}^\top \tilde{\mathbf{K}}_{b_0 \dots b_j} \alpha_{b_0 \dots b_j}$$

This claim follows from induction. In the base case,  $j = 1$ , and [Theorem 2](#) tells us that  $\alpha_\Sigma^\top \tilde{\mathbf{K}}_\Sigma \alpha_\Sigma \leq \frac{1}{3}(\alpha_0^\top \tilde{\mathbf{K}}_0 \alpha_0 + \alpha_1^\top \tilde{\mathbf{K}}_1 \alpha_1)$ , matching the claim. Now, assume the claim holds for  $j - 1$ . Then,

$$\begin{aligned}
 \alpha_\Sigma^\top \tilde{\mathbf{K}}_\Sigma \alpha_\Sigma &\leq \left(\frac{1}{3}\right)^j \sum_{b_0 \dots b_j \in [b_j]} \alpha_{b_0 \dots b_j}^\top \tilde{\mathbf{K}}_{b_0 \dots b_j} \alpha_{b_0 \dots b_j} \\
 &\leq \left(\frac{1}{3}\right)^j \sum_{b_0 \dots b_j \in [b_j]} \frac{1}{3} (\alpha_{b_0 \dots b_j 0}^\top \tilde{\mathbf{K}}_{b_0 \dots b_j 0} \alpha_{b_0 \dots b_j 0} + \alpha_{b_0 \dots b_j 1}^\top \tilde{\mathbf{K}}_{b_0 \dots b_j 1} \alpha_{b_0 \dots b_j 1}) \\
 &= \left(\frac{1}{3}\right)^{j+1} \sum_{b_0 \dots b_{j+1} \in [b_{j+1}]} \alpha_{b_0 \dots b_{j+1}}^\top \tilde{\mathbf{K}}_{b_0 \dots b_{j+1}} \alpha_{b_0 \dots b_{j+1}}
 \end{aligned}$$

This completes the proof of the claim.

Now we need to be careful when moving to the length  $\ell$  kernel labels because if  $m$  is not a power of two, then only some of the kernels have a length  $\ell$  label. Let  $\mathcal{A}$  be the set of all base kernels that have a length  $\ell - 1$  label. Let  $\mathcal{B}$  be the rest of the base kernels, with a length  $\ell$  label. By [Claim 1](#), we know that

$$\begin{aligned}
 \alpha_\Sigma^\top \tilde{\mathbf{K}}_\Sigma \alpha_\Sigma &\leq \left(\frac{1}{3}\right)^{\ell-1} \sum_{b_0 \dots b_{\ell-1} \in [b_{\ell-1}]} \alpha_{b_0 \dots b_{\ell-1}}^\top \tilde{\mathbf{K}}_{b_0 \dots b_{\ell-1}} \alpha_{b_0 \dots b_{\ell-1}} \\
 &= \sum_{b_0 \dots b_{\ell-1} \in [b_{\ell-1}]} \left(\frac{1}{3}\right)^{\ell-1} \alpha_{b_0 \dots b_{\ell-1}}^\top \tilde{\mathbf{K}}_{b_0 \dots b_{\ell-1}} \alpha_{b_0 \dots b_{\ell-1}} \\
 &= \sum_{\substack{b_0 \dots b_{\ell-1} \in [b_{\ell-1}]: \\ k_{b_0 \dots b_{\ell-1}} \in \mathcal{A}}} \left(\frac{1}{3}\right)^{\ell-1} \alpha_{b_0 \dots b_{\ell-1}}^\top \tilde{\mathbf{K}}_{b_0 \dots b_{\ell-1}} \alpha_{b_0 \dots b_{\ell-1}} + \sum_{\substack{b_0 \dots b_{\ell-1} \in [b_{\ell-1}]: \\ k_{b_0 \dots b_{\ell-1}} \notin \mathcal{A}}} \left(\frac{1}{3}\right)^{\ell-1} \alpha_{b_0 \dots b_{\ell-1}}^\top \tilde{\mathbf{K}}_{b_0 \dots b_{\ell-1}} \alpha_{b_0 \dots b_{\ell-1}} \\
 &\leq \sum_{\substack{b_0 \dots b_{\ell-1} \in [b_{\ell-1}]: \\ k_{b_0 \dots b_{\ell-1}} \in \mathcal{A}}} \left(\frac{1}{3}\right)^{\ell-1} \alpha_{b_0 \dots b_{\ell-1}}^\top \tilde{\mathbf{K}}_{b_0 \dots b_{\ell-1}} \alpha_{b_0 \dots b_{\ell-1}} + \sum_{\substack{b_0 \dots b_\ell \in [b_\ell]: \\ k_{b_0 \dots b_\ell} \in \mathcal{B}}} \left(\frac{1}{3}\right)^\ell \alpha_{b_0 \dots b_\ell}^\top \tilde{\mathbf{K}}_{b_0 \dots b_\ell} \alpha_{b_0 \dots b_\ell} \\
 &\leq \sum_{\substack{b_0 \dots b_{\ell-1} \in [b_{\ell-1}]: \\ k_{b_0 \dots b_{\ell-1}} \in \mathcal{A}}} \left(\frac{1}{3}\right)^{\ell-1} \alpha_{b_0 \dots b_{\ell-1}}^\top \tilde{\mathbf{K}}_{b_0 \dots b_{\ell-1}} \alpha_{b_0 \dots b_{\ell-1}} + \sum_{\substack{b_0 \dots b_\ell \in [b_\ell]: \\ k_{b_0 \dots b_\ell} \in \mathcal{B}}} \left(\frac{1}{3}\right)^{\ell-1} \alpha_{b_0 \dots b_\ell}^\top \tilde{\mathbf{K}}_{b_0 \dots b_\ell} \alpha_{b_0 \dots b_\ell} \\
 &\leq \left(\frac{1}{3}\right)^{\ell-1} \left( \sum_{\substack{b_0 \dots b_{\ell-1} \in [b_{\ell-1}]: \\ k_{b_0 \dots b_{\ell-1}} \in \mathcal{A}}} \alpha_{b_0 \dots b_{\ell-1}}^\top \tilde{\mathbf{K}}_{b_0 \dots b_{\ell-1}} \alpha_{b_0 \dots b_{\ell-1}} + \sum_{\substack{b_0 \dots b_\ell \in [b_\ell]: \\ k_{b_0 \dots b_\ell} \in \mathcal{B}}} \alpha_{b_0 \dots b_\ell}^\top \tilde{\mathbf{K}}_{b_0 \dots b_\ell} \alpha_{b_0 \dots b_\ell} \right) \\
 &= \left(\frac{1}{3}\right)^{\ell-1} \sum_{t=1}^m \alpha_t^\top \tilde{\mathbf{K}}_t \alpha_t
 \end{aligned}$$

Where the second inequality applies [Theorem 2](#) and the last equality uses the fact that all base kernels are in either  $\mathcal{B}$  or  $\mathcal{A}$ .

Lastly, recall that  $\ell = \lceil \log_2(m) \rceil$ .

$$\left(\frac{1}{3}\right)^{\ell-1} = 3^{1-\lceil \log_2(m) \rceil} = 3 \cdot 3^{-\lceil \log_2(m) \rceil} \leq 3 \cdot 3^{-\log_2(m)} = 3 \cdot m^{-\log_2(3)}$$

Therefore, overall, we have

$$\alpha_\Sigma^\top \tilde{\mathbf{K}}_\Sigma \alpha_\Sigma \leq 3m^{-\log_2(3)} \sum_{t=1}^m \alpha_t^\top \tilde{\mathbf{K}}_t \alpha_t$$

□

### C. Proof of Kernel Sum Rademacher ([Theorem 4](#))

**Theorem 4 Restated.** Let  $\mathcal{S} = \{(\mathbf{x}_1, y_1), \dots, (\mathbf{x}_n, y_n)\}$  be a dataset. Let  $k_1, \dots, k_m$  be kernel functions. Define  $k_\Sigma(\cdot, \cdot) := \sum_{t=1}^m k_t(\cdot, \cdot)$ . Let  $\tilde{\mathbf{K}}_1, \dots, \tilde{\mathbf{K}}_m, \tilde{\mathbf{K}}_\Sigma$  be their labeled kernel matrices and  $\alpha_1, \dots, \alpha_m, \alpha_\Sigma$  be the corresponding Dual SVM solutions. Then,

$$\hat{\mathfrak{R}}_{\mathcal{S}}(\mathcal{F}_\Sigma) \leq \frac{1}{n} \sqrt{3m^{-\log_2(3)} \left( \sum_{t=1}^m \text{Tr}[\tilde{\mathbf{K}}_t] \right) \sum_{t=1}^m \alpha_t^\top \tilde{\mathbf{K}}_t \alpha_t}$$

Further, if we assume  $\alpha_t^\top \tilde{\mathbf{K}}_t \alpha_t \leq B^2$  and  $k_t(\mathbf{x}_i, \mathbf{x}_i) \leq R^2$  for all  $t \in [m], i \in [n]$ , then

$$\hat{\mathfrak{R}}_{\mathcal{S}}(\mathcal{F}_\Sigma) \leq \frac{BR}{\sqrt{n}} \sqrt{3m^{(1-\log_2(3/2))}}$$

This proof very closely parallels that of Lemma 22 in (Bartlett & Mendelson, 2002). We produce the entire proof here for completeness. First, note that

$$\mathcal{F}_\Sigma \subseteq \{\mathbf{x} \mapsto \mathbf{w}_\Sigma^\top \phi_\Sigma \mid \|\mathbf{w}_\Sigma\|_2 \leq B_\Sigma\}$$

Where  $\phi_\Sigma$  is the concatenation of the feature spaces associated with each of the  $m$  kernels, and  $B_\Sigma^2 = \alpha_\Sigma^\top \tilde{\mathbf{K}}_\Sigma \alpha_\Sigma$ . Then,

$$\begin{aligned} \hat{\mathfrak{R}}_{\mathcal{S}}(\mathcal{F}_\Sigma) &\leq \frac{1}{n} \mathbb{E} \left[ \sup_{\|\mathbf{w}_\Sigma\|_2 \leq B_\Sigma} \left( \mathbf{w}_\Sigma^\top \sum_{i=1}^n \sigma_i y_i \phi_\Sigma(\mathbf{x}_i) \right) \right] \\ &= \frac{B_\Sigma}{n} \mathbb{E} \left[ \left\| \sum_{i=1}^n \sigma_i y_i \phi_\Sigma(\mathbf{x}_i) \right\|_2 \right] \\ &= \frac{B_\Sigma}{n} \mathbb{E} \left[ \sqrt{\left\| \sum_{i=1}^n \sigma_i y_i \phi_\Sigma(\mathbf{x}_i) \right\|_2^2} \right] \\ &= \frac{B_\Sigma}{n} \mathbb{E} \left[ \sqrt{\sum_{i,j=1}^n \sigma_i \sigma_j [\tilde{\mathbf{K}}_\Sigma]_{i,j}} \right] \\ &\leq \frac{B_\Sigma}{n} \sqrt{\mathbb{E} \left[ \sum_{i,j=1}^n \sigma_i \sigma_j [\tilde{\mathbf{K}}_\Sigma]_{i,j} \right]} \\ &= \frac{B_\Sigma}{n} \sqrt{\mathbb{E} \left[ \sum_{i=1}^n \sigma_i^2 [\tilde{\mathbf{K}}_\Sigma]_{i,i} \right]} \\ &= \frac{B_\Sigma}{n} \sqrt{\mathbb{E} \left[ \sum_{i=1}^n [\tilde{\mathbf{K}}_\Sigma]_{i,i} \right]} \\ &= \frac{B_\Sigma}{n} \sqrt{\text{Tr}[\tilde{\mathbf{K}}_\Sigma]} \\ &= \frac{B_\Sigma}{n} \sqrt{\sum_{t=1}^m \text{Tr}[\tilde{\mathbf{K}}_t]} \\ &\leq \frac{1}{n} \cdot \sqrt{3m^{(1-\log_2(3))} \sum_{t=1}^m \alpha_t^\top \tilde{\mathbf{K}}_t \alpha_t} \cdot \sqrt{\sum_{t=1}^m \text{Tr}[\tilde{\mathbf{K}}_t]} \\ &= \frac{1}{n} \sqrt{3m^{-\log_2(3)} \left( \sum_{t=1}^m \text{Tr}[\tilde{\mathbf{K}}_t] \right) \sum_{t=1}^m \alpha_t^\top \tilde{\mathbf{K}}_t \alpha_t} \end{aligned}$$

The second inequality is Jensen's, and the last inequality is [Theorem 3](#). This completes the first part of the proof. We can then substitute in  $B^2$  and  $R^2$ :

$$\begin{aligned} \hat{\mathfrak{R}}_{\mathcal{S}}(\mathcal{F}_\Sigma) &\leq \frac{1}{n} \sqrt{3m^{-\log_2(3)} \left( \sum_{t=1}^m \text{Tr}[\tilde{\mathbf{K}}_t] \right) \sum_{t=1}^m \alpha_t^\top \tilde{\mathbf{K}}_t \alpha_t} \\ &\leq \frac{1}{n} \sqrt{3m^{-\log_2(3)} \left( \sum_{t=1}^m nR^2 \right) \sum_{t=1}^m B^2} \\ &= \frac{1}{n} \sqrt{3m^{-\log_2(3)} \cdot mnR^2 \cdot mB^2} \\ &= \frac{BR}{\sqrt{n}} \sqrt{3m^{(1-\log_2(3/2))}} \end{aligned}$$

## D. Proof of Learning Kernels (Theorem 5)

**Theorem 5 Restated.** Let  $\mathcal{S} = \{(\mathbf{x}_1, y_1), \dots, (\mathbf{x}_n, y_n)\}$  be a dataset. Let  $k_1, \dots, k_m$  be kernel functions. Consider any  $\mathcal{P} \subseteq [m]$ . Define  $k_{\mathcal{P}}(\cdot, \cdot) := \sum_{t \in \mathcal{P}} k_t(\cdot, \cdot)$ . Let  $\tilde{\mathbf{K}}_1, \dots, \tilde{\mathbf{K}}_m, \tilde{\mathbf{K}}_{\mathcal{P}}$  be their labeled kernel matrices and  $\alpha_1, \dots, \alpha_m, \alpha_{\mathcal{P}}$  be the corresponding Dual SVM solutions. Assume  $k_t(\mathbf{x}_i, \mathbf{x}_i) \leq R^2$  and  $\alpha_t^{\top} \tilde{\mathbf{K}}_t \alpha_t \leq B^2$  for all  $t \in [m]$  and  $i \in [n]$ . Then,

$$\hat{\mathfrak{R}}_{\mathcal{S}}(\mathcal{F}_{\mathcal{P}}) \leq \frac{BR\sqrt{3e\eta_0} m^{(1-\log_2(3/2))} \lceil \ln(m) \rceil}{\sqrt{n}}$$

where  $\eta_0 = \frac{23}{22}$ .

This proof closely follows that of Theorem 1 in (Cortes et al., 2009c).

*Proof.* Let  $s := |\mathcal{P}|$ . Let  $\mathbf{w}_{\mathcal{P}}$  be the optimal Primal SVM solution using subset of kernels  $\mathcal{P}$ . Note that  $\mathbf{w}_{\mathcal{P}}$  is a concatenation of  $s$  labeled and scaled feature vectors. To be precise, let  $\phi_t$  be the feature map for the  $t^{\text{th}}$  kernel and define  $\mathbf{w}_t := \sum_{i=1}^n \alpha_i y_i \phi_t(\mathbf{x}_i)$ . Then  $\mathbf{w}_{\mathcal{P}} = [\mathbf{w}_{t_1}^{\top} \dots \mathbf{w}_{t_s}^{\top}]^{\top}$ , where  $t_i$  is the  $i^{\text{th}}$  smallest element of  $\mathcal{P}$ .

Consider some  $q, r > 1$  such that  $\frac{1}{q} + \frac{1}{r} = 1$ . Then,

$$\begin{aligned} \hat{\mathfrak{R}}_{\mathcal{S}}(\mathcal{F}_{\mathcal{P}}) &:= \frac{1}{n} \mathbb{E}_{\sigma} \left[ \sup_{h \in \mathcal{F}_{\Sigma}} \sum_{i=1}^n \sigma_i h(\mathbf{x}_i, y_i) \right] \\ &\leq \frac{1}{n} \mathbb{E}_{\sigma} \left[ \sup_{s \in [m]} \sup_{|\mathcal{P}|=s} \sup_{\mathbf{w}_{\mathcal{P}}} \mathbf{w}_{\mathcal{P}}^{\top} \left( \sum_{i=1}^n \sigma_i y_i \phi_{\mathcal{P}}(\mathbf{x}_i) \right) \right] \\ &\leq \frac{1}{n} \mathbb{E}_{\sigma} \left[ \sup_{s \in [m]} \sup_{|\mathcal{P}|=s} \sup_{\mathbf{w}_{\mathcal{P}}} \left( \sum_{t \in \mathcal{P}} \|\mathbf{w}_t\|_2^q \right)^{1/q} \left( \sum_{t \in \mathcal{P}} \left\| \sum_{i=1}^n \sigma_i y_i \phi_t(\mathbf{x}_i) \right\|_2^r \right)^{1/r} \right] \\ &\leq \frac{1}{n} \mathbb{E}_{\sigma} \left[ \sup_{s \in [m]} \sup_{|\mathcal{P}|=s} \sup_{\mathbf{w}_{\mathcal{P}}} \left( \sum_{t \in \mathcal{P}} \|\mathbf{w}_t\|_2^q \right)^{1/q} \left( \sum_{t=1}^m \left\| \sum_{i=1}^n \sigma_i y_i \phi_t(\mathbf{x}_i) \right\|_2^r \right)^{1/r} \right] \\ &= \frac{1}{n} \left[ \sup_{s \in [m]} \sup_{|\mathcal{P}|=s} \sup_{\mathbf{w}_{\mathcal{P}}} \left( \sum_{t=1}^m \|\mathbf{w}_t\|_2^q \right)^{1/q} \right] \cdot \mathbb{E}_{\sigma} \left[ \left( \sum_{t=1}^m \left\| \sum_{i=1}^n \sigma_i y_i \phi_t(\mathbf{x}_i) \right\|_2^r \right)^{1/r} \right] \end{aligned}$$

The third line follows exactly from Lemma 5 in (Cortes et al., 2009c). We bound both terms separately. We only substantially differ from the original proof in bounding the first term. To start, note that  $f(x) = x^{1/q}$  is subadditive for  $1/q < 1$ :

$$\begin{aligned} \left( \sum_{t \in \mathcal{P}} \|\mathbf{w}_t\|_2^q \right)^{1/q} &\leq \sum_{t \in \mathcal{P}} (\|\mathbf{w}_t\|_2^q)^{1/q} \\ &= \sum_{t \in \mathcal{P}} \left\| \sum_{i=1}^n \alpha_i y_i \phi_t(\mathbf{x}_i) \right\|_2 \\ &= s \sum_{t \in \mathcal{P}} \frac{1}{s} \sqrt{\left\| \sum_{i=1}^n \alpha_i y_i \phi_t(\mathbf{x}_i) \right\|_2^2} \\ &\leq s \sqrt{\sum_{t \in \mathcal{P}} \frac{1}{s} \left\| \sum_{i=1}^n \alpha_i y_i \phi_t(\mathbf{x}_i) \right\|_2^2} \\ &= \sqrt{s \cdot \sum_{t \in \mathcal{P}} \alpha_{\mathcal{P}}^{\top} \tilde{\mathbf{K}}_t \alpha_{\mathcal{P}}} \\ &= \sqrt{s \cdot \alpha_{\mathcal{P}}^{\top} \tilde{\mathbf{K}}_{\mathcal{P}} \alpha_{\mathcal{P}}} \\ &\leq \sqrt{s \cdot 3s^{-\log_2(3/2)} B^2} \\ &= B\sqrt{3s^{(1-\log_2(3/2))}} \end{aligned}$$

The second inequality follows from Jensen's, and the last inequality is [Theorem 2](#).

We start our bound of the second term by applying Jensen's Inequality:

$$\begin{aligned} \mathbb{E}_{\sigma} \left[ \left( \sum_{t=1}^m \left\| \sum_{i=1}^n \sigma_i \phi_t(\mathbf{x}_i) \right\|_2^r \right)^{1/r} \right] &\leq \left( \mathbb{E}_{\sigma} \left[ \sum_{t=1}^m \left\| \sum_{i=1}^n \sigma_i \phi_t(\mathbf{x}_i) \right\|_2^r \right] \right)^{1/r} \\ &= \left( \sum_{t=1}^m \mathbb{E}_{\sigma} \left[ \left\| \sum_{i=1}^n \sigma_i \phi_t(\mathbf{x}_i) \right\|_2^r \right] \right)^{1/r} \end{aligned}$$

We detour to bound the inner expectation. Assume that  $r$  is an even integer. That is,  $r = 2p$  for some integer  $p$ .

$$\begin{aligned} \mathbb{E}_{\sigma} \left[ \left\| \sum_{i=1}^n \sigma_i \phi_t(\mathbf{x}_i) \right\|_2^r \right] &= \mathbb{E}_{\sigma} \left[ \left( \sum_{i,j=1}^n \sigma_i \sigma_j k_t(\mathbf{x}_i, \mathbf{x}_j) \right)^p \right] \\ &= \mathbb{E}_{\sigma} \left[ \left( \sigma^\top \tilde{\mathbf{K}}_t \sigma \right)^p \right] \\ &\leq \left( \eta_0 p \operatorname{Tr}[\tilde{\mathbf{K}}] \right)^p \end{aligned}$$

Where the last line follows from Lemma 1 in [\(Cortes et al., 2010\)](#), where  $\eta_0 = \frac{23}{22}$ . Returning to the bound of the second term,

$$\begin{aligned} \mathbb{E}_{\sigma} \left[ \left( \sum_{t=1}^m \left\| \sum_{i=1}^n \sigma_i \phi_t(\mathbf{x}_i) \right\|_2^r \right)^{1/r} \right] &\leq \left( \sum_{t=1}^m \mathbb{E}_{\sigma} \left[ \left\| \sum_{i=1}^n \sigma_i \phi_t(\mathbf{x}_i) \right\|_2^r \right] \right)^{1/2p} \\ &\leq \left( \sum_{t=1}^m \left( \eta_0 p \operatorname{Tr}[\tilde{\mathbf{K}}_t] \right)^p \right)^{1/2p} \\ &\leq \left( \sum_{t=1}^m \left( \eta_0 p n R^2 \right)^p \right)^{1/2p} \\ &= \left( m \left( \eta_0 p n R^2 \right)^p \right)^{1/2p} \\ &= m^{1/2p} \sqrt{\eta_0 p n R^2} \end{aligned}$$

By differentiating, we find that  $p = \ln(m)$  minimizes this expression. We required  $p$  to be an integer, so we instead take  $p = \lceil \ln(m) \rceil$ .

$$\begin{aligned} \mathbb{E}_{\sigma} \left[ \left( \sum_{t=1}^m \left\| \sum_{i=1}^n \sigma_i \phi_t(\mathbf{x}_i) \right\|_2^r \right)^{1/r} \right] &\leq R m^{1/2p} \sqrt{\eta_0 p n} \\ &= R m^{\frac{1}{2\lceil \ln(m) \rceil}} \sqrt{\eta_0 \lceil \ln(m) \rceil n} \\ &\leq R \sqrt{e \eta_0 \lceil \ln(m) \rceil n} \end{aligned}$$

Combining the first and second terms' bounds, we return to the bound of the Rademacher complexity itself:

$$\begin{aligned} \hat{\mathfrak{R}}_{\mathcal{S}}(\mathcal{F}_{\mathcal{P}}) &\leq \frac{1}{n} \left[ \sup_{s \in [m]} \sup_{|\mathcal{P}|=s} \sup_{\mathbf{w}_{\mathcal{P}}} \left( \sum_{t=1}^m \|\mathbf{w}_t\|_2^q \right)^{1/q} \right] \cdot \mathbb{E}_{\sigma} \left[ \left( \sum_{t=1}^m \left\| \sum_{i=1}^n \sigma_i y_i \phi_t(\mathbf{x}_i) \right\|_2^r \right)^{1/r} \right] \\ &\leq \frac{1}{n} \left[ \sup_{s \in [m]} B \sqrt{3s^{(1-\log_2(3/2))}} \right] \cdot \left[ R \sqrt{e \eta_0 \lceil \ln(m) \rceil n} \right] \\ &= \frac{1}{n} \left[ B \sqrt{3m^{(1-\log_2(3/2))}} \right] \cdot \left[ R \sqrt{e \eta_0 \lceil \ln(m) \rceil n} \right] \\ &= \frac{BR \sqrt{3e \eta_0 m^{(1-\log_2(3/2))} \lceil \ln(m) \rceil}}{\sqrt{n}} \end{aligned}$$

□
